# Supplementary material for: Dystocia and Analgesia: Which Came First? Association Between in Labor Request of Neuraxial Labor Analgesia and Obstetric Outcomes: a Community-Based Retrospective Cohort Study
Source: Research Square preprint supplement (doi:10.21203/rs.3.rs-7041007/v1), 2025-07-31
Supplement: Supplementary file 1 [file f5b8460ba9376792aa7c84ca.docx]

**Table S1.** Descriptive statistics for the overall sample, stratified by the timing of analgesia request.

AP: *a priori* request, IL: in labor request; BMI: Body Mass Index; ROA: Right Occiput Anterior ROP: Right Occiput Posterior; OIP: occiput posterior (left or right not reported); LOA: Left Occiput Anterior, LOP: Left Occiput Posterior, AO: occiput posterior (Right or left not reported).

|  | **AP group** | **IL group** | **Overall** | **p-value** |  |
| --- | --- | --- | --- | --- | --- |
|  | *n=395* | *n=1510* | *n=1905* |  |  |
| **Maternal Age (years)**  Mean (SD)  Median [IQR] | 31.6 (5.4)  31 [28-35] | 30.1 (5.5)  30 [26-34] | 30.4 (5.5)  30 [27-34] | **<0.001**  **<0.001** |  |
| **Maternal BMI**  Mean (SD)  Median [IQR] | 22.8 (4.5)  22 [20-24] | 23 (4.3)  22 [20-25] | 22.9 (4.4)  22 [20-25] | 0.50  0.20 |  |
| **Maternal BMI categories** |  |  |  | 0.88 |  |
| *<25* | 303 (76.7%) | 1153 (76.4%) | 1456 (76.4%) |  |  |
| *≥25* | 92 (23.3%) | 357 (23.6%) | 449 (23.6%) |  |  |
| **Maternal height (cm)**  Mean (SD)  Median [IQR] | 164.76 (6.23)  165 [160-170] | 164.71 (6.39)  165 [160-170] | 164.72 (6.36)  165 [160-170] | 0.88  0.88 |  |
| **Gestational age (days)**  Mean (SD)  Median [IQR] | 278.2 (9.9)  280 [273-285] | 279.0 (9.9)  280 [273 -286] | 278.8 (9.9)  280 [273-286] | 0.20  0.17 |  |
| **Cervical dilatation at onset of analgesia (cm)**  Mean (SD)  Median [IQR] | 4.1 (1.5)  4 [3 -5] | 4.3 (1.5)  4 [3 -5] | 4.2 (1.5)  4 [3-5] | 0.069  0.056 |  |
| **Bishop score**  Mean (SD)  Median [IQR] | 9 (2)  9 [8-10] | 8.9 (1.9)  9 [8-10] | 8.9 (2)  9 [8-10] | 0.41  0.48 |  |
| **Presenting part position** |  |  |  | 0.69 |  |
| *ROA* | 54 (16.0%) | 200 (18.0%) | 254 (17.5%) |  |  |
| *ROP* | 5 (1.5%) | 18 (1.6%) | 23 (1.6%) |  |  |
| *OP* | 0 (0.0%) | 1 (0.1%) | 1 (0.1%) |  |  |
| *LOA* | 269 (79.8%) | 851 (76.4%) | 1120 (77.2%) |  |  |
| *LOP* | 4 (1.2%) | 30 (2.7%) | 34 (2.3%) |  |  |
| *OA* | 5 (1.5%) | 12 (1.1%) | 17 (1.2%) |  |  |
| *transverse* | 0 (0.0%) | 1 (0.1%) | 1 (0.1%) |  |  |
| *face* | 0 (0.0%) | 1 (0.1%) | 1 (0.1%) |  |  |
| **Part position presented categories** |  |  |  | 0.36 |  |
| *LOA* | 269 (79.8%) | 851 (76.4%) | 1120 (77.2%) |  |  |
| *ROA* | 54 (16.0%) | 200 (18.0%) | 254 (17.5%) |  |  |
| *Other* | 14 (4.2%) | 63 (5.7%) | 77 (5.3%) |  |  |
| **Neonatal weight (g)**  Mean (SD)  Median [IQR] | 3209.7 (439.4)  3195 [2930-3480] | 3268.7 (422)  3270 [3010-3550] | 3256.5 (426.2)  3250 [3000-3530] | **0.014**  **0.007** |  |
| **Neonatal weight categories** |  |  |  | 0.26 |  |
| *<2500 g* | 19 (4.8%) | 55 (3.6%) | 74 (3.9%) |  |  |
| *2500 g- 4000 g* | 364 (92.2%) | 1387 (91.9%) | 1751 (91.9%) |  |  |
| *≥4000 g* | 12 (3.0%) | 68 (4.5%) | 80 (4.2%) |  |  |
|  |  |  |  |  |  |

**Table S2.** Descriptive statistics for the overall sample, stratified by the obstetric outcome. BMI: Body Mass Index; ROA: Right Occiput Anterior OIRP: Right Occiput Posterior; OIP: occiput posterior (left or right not reported); LOA: Left Occiput Anterior, LOP: Left Occiput Posterior, AO: occiput posterior (Right or left not reported).

|  | **Spontaneous vaginal delivery** | **Vacuum extraction** | **Cesarean delivery** | **Overall** | **p-value** |  |
| --- | --- | --- | --- | --- | --- | --- |
|  | *n=1342* | *n=126* | *n=437* | *n=1905* |  |  |
| **Maternal Age (years)**  Mean (SD)  Median [IQR] | 29.9 (5.4)  30 [26-33] | 31.9 (5.4)  32 [28-35] | 31.6 (5.5)  32 [28-36] | 30.4 (5.5)  30 [27-34] | **<0.001**  **<0.001** |  |
| **Maternal BMI**  Mean (SD)  Median [IQR] | 22.7 (4.2)  22 [20-24] | 21.8 (3.8)  21 [19-24] | 23.8 (4.9)  23 [20-26] | 22.9 (4.4)  22 [20-25] | **<0.001**  **<0.001** |  |
| **Maternal BMI categories** |  |  |  |  | **<0.001** |  |
| *<25* | 1054 (78.5%) | 104 (82.5%) | 298 (68.2%) | 1456 (76.4%) |  |  |
| *≥25* | 288 (21.5%) | 22 (17.5%) | 139 (31.8%) | 449 (23.6%) |  |  |
| **Maternal height (cm)**  Mean (SD)  Median [IQR] | 165.19 (6.3)  165 [160-170] | 165.33 (6.68)  165 [160-170] | 163.11 (6.17)  163 [160-168] | 164.72 (6.36)  165 [160-170] | **<0.001**  **<0.001** |  |
| **Gestational age (days)**  Mean (SD)  Median [IQR] | 278.1 (9.9)  280 [273-285] | 279.4 (8.5)  280 [273-285] | 280.9 (9.9)  282 [276-287] | 278.8 (9.9)  280 [273-286] | **<0.001**  **<0.001** |  |
| **Cervical dilatation at onset of analgesia (cm)**  Mean (SD)  Median [IQR] | 4.3 (1.5)  4 [3-5] | 4.4 (1.5)  4 [3-5] | 3.8 (1.6)  4 [3-4] | 4.2 (1.5)  4 [3-5] | **<0.001**  **<0.001** |  |
| **Bishop score**  Mean (SD)  Median [IQR] | 9.1 (1.8)  9 [8-10] | 9 (2)  9 [8-10] | 8.2 (2.1)  8 [7-10] | 8.9 (2)  9 [8-10] | **<0.001**  **<0.001** |  |
| **Presenting part position** |  |  |  |  | **<0.001** |  |
| *ROA* | 226 (17.5%) | 24 (20.0%) | 4 (9.8%) | 254 (17.5%) |  |  |
| *ROP* | 18 (1.4%) | 2 (1.7%) | 3 (7.3%) | 23 (1.6%) |  |  |
| *OP* | 0 (0.0%) | 0 (0.0%) | 1 (2.4%) | 1 (0.1%) |  |  |
| *LOA* | 1013 (78.5%) | 88 (73.3%) | 19 (46.3%) | 1120 (77.2%) |  |  |
| *LOP* | 24 (1.9%) | 5 (4.2%) | 5 (12.2%) | 34 (2.3%) |  |  |
| *OA* | 9 (0.7%) | 1 (0.8%) | 7 (17.1%) | 17 (1.2%) |  |  |
| *transverse* | 0 (0.0%) | 0 (0.0%) | 1 (2.4%) | 1 (0.1%) |  |  |
| *face* | 0 (0.0%) | 0 (0.0%) | 1 (2.4%) | 1 (0.1%) |  |  |
| **Part position presented categories** |  |  |  |  | **<0.001** |  |
| *LOA* | 1013 (78.5%) | 88 (73.3%) | 19 (46.3%) | 1120 (77.2%) |  |  |
| *ROA* | 226 (17.5%) | 24 (20.0%) | 4 (9.8%) | 254 (17.5%) |  |  |
| *Other* | 51 (4.0%) | 8 (6.7%) | 18 (43.9%) | 77 (5.3%) |  |  |
| **Neonatal weight (g)**  Mean (SD)  Median [IQR] | 3227.6 (424.4)  3220 [2960-3500] | 3270.9 (381.6)  3325 [3020-3510] | 3341.1 (433.3)  3315 [3080-3600] | 3256.5 (426.2)  3250 [3000-3530] | **<0.001**  **<0.001** |  |
| **Neonatal weight categories** |  |  |  |  | **<0.001** |  |
| *<2500 g* | 59 (4.4%) | 3 (2.4%) | 12 (2.7%) | 74 (3.9%) |  |  |
| *2500 g- 4000 g* | 1240 (92.4%) | 119 (94.4%) | 392 (89.7%) | 1751 (91.9%) |  |  |
| *≥4000 g* | 43 (3.2%) | 4 (3.2%) | 33 (7.6%) | 80 (4.2%) |  |  |
| **Analgesia duration (minutes)**  Mean (SD)  Median [IQR] | 274.9 (142.7)  249.5 [174-340] | 344.6 (146)  318.5 [247-427] | 310 (200.3)  289 [138 -440] | 287.6 (159.3)  260 [172-367] | **<0.001**  **<0.001** |  |
| **Total dose of ropivacaine (mg)**  Mean (SD)  Median [IQR] | 22.5 (16.6)  18.0 [11.3-32.0] | 27.5 (17.2)  24.2 [16.0-33.3] | 20.8 (22.9)  15.7 [2.0-31.3] | 22.5 (18.3)  18.0 [11.2-32.0] | **<0.001**  **<0.001** |  |
| **Total dose of bupivacaine (mg)**  Mean (SD)  Median [IQR] | 15.1 (11.1)  12.1 [7.6-21.4] | 18.4 (11.5)  16.2 [10.7-22.3] | 13.9 (15.3)  10.5 [1.3-21] | 15.1 (12.3)  12.1 [7.5-21.4] | **<0.001**  **<0.001** |  |
| **Hourly dose of ropivacaine (mg/h)**  Mean (SD)  Median [IQR] | 6.0 (24.8)  4.7 [3.0-6.4] | 4.9 (2.6)  4.5 [3.2-6.0] | 3.7 (4.2)  3.2 [1.3-4.9] | 5.4 (21)  4.3 [2.7-6.1] | 0.13  **<0.001** |  |
| **Equivalent dose of bupivacaine (mg eq/h)**  Mean (SD)  Median [IQR] | 4.0 (16.6)  3.2 [2.0-4.3] | 3.3 (1.7)  3.0 [2.2-4.0] | 2.5 (2.8)  2.1 [0.9-3.3] | 3.6 (14)  2.9 [1.8-4.1] | 0.13  **<0.001** |  |
| **Induction of labor** | 502 (37.4%) | 49 (38.9%) | 224 (51.3%) | 775 (40.7%) | **<0.001** |  |
| **Timing of request of analgesia** |  |  |  |  | **<0.001** |  |
| *a priori* | 305 (22.7%) | 36 (28.6%) | 54 (12.4%) | 395 (20.7%) |  |  |
| *in labor* | 1037 (77.3%) | 90 (71.4%) | 383 (87.6%) | 1510 (79.3%) |  |  |
|  |  |  |  |  |  |  |

**Table S3.** Results from multinomial logistic regression model adjusted for propensity score. The relative-risk ratios (RRRs), 95% confidence intervals (*95%CI*), and p-values (*p*) are reported.

|  | **Risk and protective factors for obstetric outcomes** | | |
| --- | --- | --- | --- |
|  | *RRRs* | *95%CI* | *p* |
| **Vacuum extraction** |  |  |  |
| Timing of request: in labor vs a priori | 0.80 | 0.53 – 1.21 | 0.300 |
| **Cesarean delivery** |  |  |  |
| Timing of request: in labor vs a priori | **2.26** | 1.65 – 3.10 | **<0.001** |

**Table S4.** Multinomial logistic regressionmultivariable model’s resulting relative-risk ratios (RRRs), with corresponding 95% confidence intervals (*95%CI*) and p-values (*p*). Only data collected between 2010 and 2016 were considered in the analysis. When stratifying analyses, an increased risk of cesarean delivery was still observed in the IL group during the 2010-2016 period (RRR: 1.89; 95%CI: 1.26 to 2.85; P = 0.002), which was even higher between 2017 and 2023 (RRR: 3.10; 95%CI: 1.81 to 5.31; P < 0.001). BMI: Body Mass Index.

|  | **Risk and protective factors for obstetric outcomes** | | |
| --- | --- | --- | --- |
| *Predictors* | *RRRs* | *95%CI* | *p* |
| **Vacuum extraction** |  |  |  |
| Timing of request: in labor vs a priori | 0.79 | 0.45 – 1.38 | 0.414 |
| Maternal BMI ≥ 25 | 0.98 | 0.52 – 1.85 | 0.948 |
| Maternal height (on a difference of 5 cm) | 0.94 | 0.76 – 1.15 | 0.525 |
| Maternal age (on a difference of 5 years) | **1.36** | 1.08 – 1.72 | **0.008** |
| **Cesarean delivery** |  |  |  |
| Timing of request: in labor vs a priori | **1.91** | 1.28 – 2.86 | **0.002** |
| Maternal BMI ≥ 25 | **1.76** | 1.27 – 2.45 | **0.001** |
| Maternal height (on a difference of 5 cm) | **0.76** | 0.68 – 0.86 | **<0.001** |
| Maternal age (on a difference of 5 years) | **1.24** | 1.09 – 1.42 | **0.001** |

**Table S5.** Multinomial logistic regressionmultivariable model’s resulting relative-risk ratios (RRRs), with corresponding 95% confidence intervals (*95%CI*) and p-values (*p*). Only data collected between 2017 and 2023 were considered in the analysis. When stratifying analyses, an increased risk of cesarean delivery was still observed in the IL group during the 2010-2016 period (RRR: 1.89; 95%CI: 1.26 to 2.85; P = 0.002), which was even higher between 2017 and 2023 (RRR: 3.10; 95%CI: 1.81 to 5.31; P < 0.001). BMI: Body Mass Index.

|  | **Risk and protective factors for obstetric outcomes** | | |
| --- | --- | --- | --- |
| *Predictors* | *RRRs* | *95%CI* | *p* |
| **Vacuum extraction** |  |  |  |
| Timing of request: in labor vs a priori | 0.78 | 0.42 – 1.45 | 0.435 |
| Maternal BMI ≥ 25 | 0.57 | 0.27 – 1.20 | 0.139 |
| Maternal height (on a difference of 5 cm) | 1.07 | 0.87 – 1.32 | 0.523 |
| Maternal age (on a difference of 5 years) | **1.41** | 1.09 – 1.83 | **0.008** |
| **Cesarean delivery** |  |  |  |
| Timing of request: in labor vs a priori | **3.23** | 1.89 – 5.53 | **<0.001** |
| Maternal BMI ≥ 25 | **1.53** | 1.05 – 2.24 | **0.027** |
| Maternal height (on a difference of 5 cm) | **0.76** | 0.66 – 0.87 | **<0.001** |
| Maternal age (on a difference of 5 years) | **1.59** | 1.35 – 1.87 | **<0.001** |
